# Supplementary material for: 2D-QSAR and 3D-QSAR Analyses for EGFR Inhibitors
Source: Biomed Res Int. 2017 May 29;2017:4649191. doi: 10.1155/2017/4649191 (PMC5467385; doi:10.1155/2017/4649191)
Supplement: Supplementary file 1 — The Supplementary Material includes: 1. A training set for building prediction model. 2. A test set for validation. [file 4649191.f1.xlsx]

## Sheet: Training set
ID	Name	MF	pIC50	Pc	DPLL	Homo	HF	H	CLogPMR	TIndx	VP	WIndx
1	N-phenylquinazolin-4-amine	C14H12N3	6.46	36.5093	3.53545	-8.31152	439.42	8.6435	6.8343	4126	0	518
3	N-(3-bromophenyl)quinazolin-4-amine	C14H11BrN3	7.57	39.0137	2.06981	-8.47828	454.28	9.0432	7.6113	4563	0	608
4	N-(3-(trifluoromethyl)phenyl)quinazolin-4-amine	C15H11F3N3	6.24	28.2332	1.32774	-8.60953	-189.77	7.7045	7.3446	6420	0	938
6	N-(3-bromophenyl)-6-methoxyquinazolin-4-amine	C15H13BrN3O	6.45	33.4511	2.48958	-8.1975	289.95	10.2712	8.2282	5951	0	815
7	N-(3-bromophenyl)-7-nitroquinazolin-4-amine	C14H10BrN4O2	6	0	6.15612	-9.07285	0	8.3631	8.2228	6585	0	954
9	N-(3-fluorophenyl)quinazolin-4-amine	C14H11FN3	7.25	33.9994	2.07321	-8.45475	231.84	8.5764	6.8498	4563	0	608
10	6-methoxy-N-phenylquinazolin-4-amine	C15H14N3O	7.25	31.4556	3.13816	-8.02971	275.09	9.8715	7.4512	5437	0	706
12	N4-(3-(trifluoromethyl)phenyl)quinazoline-4,6-diamine	C15H14F3N4	6.24	29.5369	3.78101	-7.85003	-167.45	11.1562	7.7133	7190	0	1062
14	N-(3-fluorophenyl)-7-nitroquinazolin-4-amine	C14H10FN4O2	5.21	0	6.08205	-9.06145	0	8.3631	7.4613	6585	0	954
16	N-(3-iodophenyl)-7-nitroquinazolin-4-amine	C14H10IN4O2	6.26	0	6.11972	-9.08173	0	8.3631	8.7522	6585	0	954
18	N-(3-chlorophenyl)-6,7-dimethoxyquinazolin-4-amine	C16H15ClN3O2	9.5	25.9513	2.29746	-8.19276	83.55	11.2297	8.5595	7543	0	1054
20	N4-(3-bromophenyl)-N6-methylquinazoline-4,6-diamine	C15H15BrN4	8.39	34.6428	3.96516	-7.66395	475.64	12.1524	8.4438	6048	0	815
21	N4-(3-bromophenyl)-N6,N6-dimethylquinazoline-4,6-diamine	C16H16BrN4	7.07	30.5241	4.66971	-7.4712	469.06	11.8099	8.9076	6926	0	930
22	methyl 4-(3-bromophenylamino)quinazolin-6-ylcarbamate	C16H15BrN4O2	7.92	31.21	0.898966	-8.23077	137.72	14.4353	9.0964	8743	0	1240
23	4-(3-bromophenylamino)quinazolin-7-ol	C14H12BrN3O	8.32	47.4315	1.18598	-8.56175	276.97	13.026	7.7644	5135	0	710
24	N4-(3-bromophenyl)-N7-methylquinazoline-4,7-diamine	C15H15BrN4	8.15	34.6428	3.60781	-8.25501	475.64	12.1524	8.4438	6160	0	831
26	N4-(3-bromophenyl)-N7,N7-dimethylquinazoline-4,7-diamine	C16H16BrN4	7.95	30.5241	3.86835	-8.2167	469.06	11.8099	8.9076	7098	0	954
28	N4-(3-bromophenyl)-N7,N7-dimethylquinazoline-4,6,7-triamine	C16H19BrN5	6.79	31.9916	6.43544	-7.48398	491.38	15.2616	9.2763	7795	0	1059
30	N4-(3-bromophenyl)-7-chloroquinazoline-4,6-diamine	C14H13BrClN4	8.18	38.5309	3.47019	-7.87977	449.39	12.6251	8.4714	5667	0	807
31	N-(3-bromophenyl)-7-methoxy-6-nitroquinazolin-4-amine	C15H12BrN4O3	7.82	0	3.14325	-7.92581	0	8.2536	8.8397	8070	0	1178
32	N-(3-bromophenyl)-7-chloro-6-nitroquinazolin-4-amine	C14H9BrClN4O2	7.6	0	2.96855	-8.04835	0	8.2536	8.7142	6949	0	1043
34	6,7-dimethoxy-N-p-tolylquinazolin-4-amine	C17H18N3O2	9.01	24.4589	2.5324	-7.998	78.65	11.0566	8.5319	8049	0	1069
35	N-(3-bromophenyl)pyrido[3,2-d]pyrimidin-4-amine	C13H10BrN4	7.46	44.2084	3.64444	-8.69291	507.71	11.9263	7.4002	4497	0	608
36	N4-(3-bromophenyl)pyrido[3,2-d]pyrimidine-4,6-diamine	C13H13BrN5	8.11	46.7849	6.43127	-8.18656	530.03	15.378	7.7689	5118	0	702
37	N-(3-bromophenyl)-6-chloropyrido[3,2-d]pyrimidin-4-amine	C13H9BrClN4	7.74	41.3029	3.08268	-8.78772	480.5	12.0565	7.8916	4928	0	702
39	N4-(3-bromophenyl)-N6-methylpyrido[3,2-d]pyrimidine-4,6-diamine	C14H14BrN5	8.5	38.965	5.77065	-8.30715	529.07	15.0355	8.2327	5977	0	815
42	N-(4-(3-bromophenylamino)pyrido[4,3-d]pyrimidin-7-yl)acetamide	C15H14BrN5O	7.53	39.0137	5.38271	-8.84075	342.75	17.8672	8.7322	7949	0	1115
43	N-(3-bromophenyl)-7-fluoropyrido[4,3-d]pyrimidin-4-amine	C13H9BrFN4	7.88	40.8815	0.291473	-9.15424	300.13	11.8592	7.4157	4952	0	710
44	N-(3-bromophenyl)-7-methoxypyrido[4,3-d]pyrimidin-4-amine	C14H12BrN4O	7.4	37.5457	2.42152	-9.00512	343.38	13.1543	8.0171	5972	0	831
47	N4-(3-bromophenyl)pyrido[4,3-d]pyrimidine-4,7-diamine	C13H13BrN5	8	46.7849	4.94018	-8.79601	530.03	15.378	7.7689	5158	0	710
49	N4-(2-methoxyphenyl)pyrido[4,3-d]pyrimidine-4,7-diamine	C14H16N5O	5.43	36.9995	3.54834	-8.32958	350.84	16.2063	7.6088	6016	0	805
52	N4-(2-aminophenyl)pyrido[4,3-d]pyrimidine-4,7-diamine	C13H17N6	5.27	46.0262	5.32528	-7.7709	537.49	18.43	7.3606	5281	0	698
53	N4-(3-(dimethylamino)phenyl)pyrido[4,3-d]pyrimidine-4,7-diamine	C15H19N6	5.74	33.6064	4.08656	-7.71997	529.95	17.745	8.2882	7210	0	950
54	N4-(4-(dimethylamino)phenyl)pyrido[4,3-d]pyrimidine-4,7-diamine	C15H19N6	5.31	33.6064	2.06517	-7.37321	529.95	17.745	8.2882	7471	0	986
55	N4-(3-fluorophenyl)pyrido[4,3-d]pyrimidine-4,7-diamine	C13H13FN5	6.07	40.2613	4.9071	-8.76675	307.59	14.9112	7.0074	5158	0	710
58	N-(3-bromophenyl)pyrido[3,4-d]pyrimidin-4-amine	C13H10BrN4	7.29	44.2084	1.3133	-8.95879	507.71	11.9263	7.4002	4477	0	608
59	N-(3-bromophenyl)-6-chloropyrido[3,4-d]pyrimidin-4-amine	C13H9BrClN4	7.39	41.3029	0.491487	-9.03339	480.5	12.0565	7.8916	4908	0	702
60	N-(3-bromophenyl)-6-fluoropyrido[3,4-d]pyrimidin-4-amine	C13H9BrFN4	6.9	40.8815	0.359006	-9.01642	300.13	11.8592	7.4157	4908	0	702
61	N-(3-bromophenyl)-6-methoxypyrido[3,4-d]pyrimidin-4-amine	C14H12BrN4O	8.58	37.5457	2.52749	-8.75051	343.38	13.1543	8.0171	5860	0	815
62	N4-(3-bromophenyl)-N6-(4-methoxyphenyl)pyrido[3,4-d]pyrimidine-4,6-diamine	C20H18BrN5O	8.63	28.3235	1.48813	-8.07518	498.07	16.8642	10.897	14675	0	2012
64	N4-(3-bromophenyl)pyrido[2,3-d]pyrimidine-4,7-diamine	C13H13BrN5	6.02	46.7849	5.3379	-8.79549	530.03	15.378	7.7689	5162	0	710
65	N4-(3-bromophenyl)-N7-methylpyrido[2,3-d]pyrimidine-4,7-diamine	C14H14BrN5	7.28	38.965	4.54678	-8.8652	529.07	15.0355	8.2327	6081	0	831
66	N4-(3-bromophenyl)-N7,N7-dimethylpyrido[2,3-d]pyrimidine-4,7-diamine	C15H15BrN5	6.48	34.0789	5.52593	-8.73073	522.49	14.693	8.6965	7016	0	954
67	N-(3-bromophenyl)-7-methoxypyrido[2,3-d]pyrimidin-4-amine	C14H12BrN4O	6.58	37.5457	2.8689	-9.04917	343.38	13.1543	8.0171	5976	0	831
69	N-(3-bromophenyl)-6-chloropyrimido[5,4-d]pyrimidin-4-amine	C12H8BrClN5	7.08	46.9774	1.05175	-9.00732	533.93	14.9396	7.6805	4840	0	702
70	N4-(3-bromophenyl)pyrimido[5,4-d]pyrimidine-4,6-diamine	C12H12BrN6	8.82	53.6704	4.37964	-8.42205	583.46	18.2611	7.5578	5030	0	702
71	N8-(3-bromophenyl)-N2-methylpyrimido[5,4-d]pyrimidine-2,8-diamine	C13H13BrN6	9.11	44.1496	1.98819	-8.0954	582.5	17.9186	8.0216	5886	0	815
73	N-(3-bromophenyl)-6-methoxypyrimido[5,4-d]pyrimidin-4-amine	C13H11BrN5O	8.42	42.4408	3.1438	-8.75443	396.81	16.0374	7.806	5789	0	815
75	N8-(3-bromophenyl)-N2-(3-morpholinopropyl)pyrimido[5,4-d]pyrimidine-2,8-diamine	C19H24BrN7O	8.53	28.3235	1.61062	-8.08179	475.01	26.5384	11.1488	17098	0	2383
76	N2-(2-(1H-imidazol-1-yl)ethyl)-N8-(3-bromophenyl)pyrimido[5,4-d]pyrimidine-2,8-diamine	C17H17BrN8	8.63	0	3.35656	-8.35028	0	20.6546	10.215	13444	0	1859
77	6-chloro-N-(m-tolyl)pyrimido[5,4-d]pyrimidin-4-amine	C13H11ClN5	6.42	37.9165	1.14317	-8.75724	486.96	14.497	7.3673	5140	0	702
79	N2-methyl-N8-(m-tolyl)pyrimido[5,4-d]pyrimidine-2,8-diamine	C14H16N6	8.36	35.8564	2.83076	-7.86253	535.53	17.476	7.7084	6216	0	815
80	N2-(2-morpholinoethyl)-N8-(m-tolyl)pyrimido[5,4-d]pyrimidine-2,8-diamine	C19H25N7O	8.63	26.3525	2.58729	-7.87162	448.68	26.2189	10.3718	15535	0	2088
81	N-(3-chloro-4-((3-fluorobenzyl)oxy)phenyl)-6-methyl-5-(phenylethynyl)pyrimidin-4-amine	C26H20ClFN3O	6.19	17.5214	0.248913	-7.61607	356.08	5.9883	12.6331	25396	1.25	3446
82	N-(3-chloro-4-((3-fluorobenzyl)oxy)phenyl)-5-((4-((isopropylamino)methyl)phenyl)ethynyl)-6-methylpyrimidin-4-amine	C30H30ClFN4O	8.52	13.0612	1.28324	-7.56143	310.24	5.9883	14.857	39860	1.25	5402
83	N-(3-chloro-4-((3-fluorobenzyl)oxy)phenyl)-6-methyl-5-((4-(pyrrolidin-1-ylmethyl)phenyl)ethynyl)pyrimidin-4-amine	C31H29ClFN4O	8.05	13.7378	1.70398	-7.47448	395.92	5.9883	15.1434	42917	1.25	5804
84	N-(3-chloro-4-((3-fluorobenzyl)oxy)phenyl)-5-((3-fluoro-4-(pyrrolidin-1-ylmethyl)phenyl)ethynyl)-6-methylpyrimidin-4-amine	C31H28ClF2N4O	6.72	13.1465	2.81735	-7.65349	188.34	5.9883	15.1589	44443	1.25	6137
85	N-(3-chloro-4-((3-fluorobenzyl)oxy)phenyl)-6-methyl-5-((5-(pyrrolidin-1-ylmethyl)furan-2-yl)ethynyl)pyrimidin-4-amine	C29H27ClFN4O2	7.1	15.0698	1.5169	-7.75304	253.58	5.9883	14.5093	38674	1.25	5312
88	N-(3-chloro-4-((3-fluorobenzyl)oxy)phenyl)pyrimidin-4-amine	C17H14ClFN3O	6.04	25.3537	0.560829	-8.78551	55.95	10.0171	8.7813	9964	1.25	1400
89	N-(3-chloro-4-((3-fluorobenzyl)oxy)phenyl)-6-methylpyrimidin-4-amine	C18H16ClFN3O	5.94	22.7407	0.246528	-8.73316	23.84	9.9742	9.2451	11270	1.25	1574
90	N-(3-chloro-4-((3-fluorobenzyl)oxy)phenyl)-6-(pyridin-3-yl)pyrimidin-4-amine	C22H17ClFN4O	4.33	21.6535	2.85502	-8.99116	210.6	14.0148	11.0814	19350	1.25	2678
92	N-(3-chloro-4-((3-fluorobenzyl)oxy)phenyl)-6-phenoxypyrimidin-4-amine	C23H18ClFN3O2	5	19.5268	1.54693	-8.86835	24.95	11.6773	11.4456	21663	1.25	3005
93	(E)-4-((3-chloro-4-((3-fluorobenzyl)oxy)phenyl)amino)-6-methylpyrimidine-5-carbaldehyde O-(2-morpholinoethyl) oxime	C25H28ClFN5O3	7.17	13.6769	2.16053	-8.03128	-165.76	8.2175	13.4845	33031	1.25	4692
94	(E)-4-((3-chloro-4-((3-fluorobenzyl)oxy)phenyl)amino)-6-methylpyrimidine-5-carbaldehyde O-(3-morpholinopropyl) oxime	C26H30ClFN5O3	7.19	12.7551	2.83728	-8.01639	-186.4	8.2175	13.9483	36581	1.25	5176
95	N-(3-chloro-4-((3-fluorobenzyl)oxy)phenyl)-6-methyl-5-(3-(morpholinomethyl)phenyl)pyrimidin-4-amine	C29H29ClFN4O2	6.23	14.2399	3.23263	-7.318	26.74	16.5119	14.4197	36128	1.25	4998
97	N-(1-(2-chloro-6-fluorobenzyl)-1H-pyrazol-3-yl)-1,3-dimethyl-1H-pyrazole-4-carboxamide	C16H16ClFN5O	4.14	0	6.86441	-7.32398	0	0	8.9143	10379	1.25	1486
98	N-(3-chloro-4-((3-fluorobenzyl)oxy)phenyl)-6-(5-(((2-(methylsulfonyl)ethyl)amino)methyl)furan-2-yl)quinazolin-4-amine	C29H28ClFN4O4S	8.05	13.1275	7.30621	-8.03587	71.31	16.1514	15.2908	47734	1.25	6645
99	N-(3-((6-((3-chloro-4-((3-fluorobenzyl)oxy)phenyl)amino)pyrimidin-4-yl)oxy)phenyl)acetamide	C25H22ClFN4O3	6.97	17.9546	7.58085	-8.35562	-140.01	17.6182	12.7776	30444	1.25	4304
100	N-(3-((6-((3-chloro-4-((3-fluorobenzyl)oxy)phenyl)amino)pyrimidin-4-yl)oxy)phenyl)-2-(2,4,5-trifluorophenyl)acetamide	C31H23ClF4N4O3	6.2	12.8929	6.96451	-8.38148	-650.06	18.5098	15.3353	57116	1.25	8456
ZINC_A1	(1R,3R)-3-((2-hydroxy-2,2-diphenylacetoxy)methyl)-1-methylpyrrolidinium	C20H26NO3+		0	21.7769	-11.9627	0	0	9.5321	10232	90.9118	1323
ZINC_A10	(1r,4r)-1-((1H-pyrrolo[2,3-b]pyridin-3-yl)methyl)-4-phenethylpiperidinium	C21H28N3+		0	6.16358	-11.555	0	0	10.424	13058	90.9118	1690
ZINC_A101	(1r,4r)-1-(2-(1,3-dioxoisoindolin-2-yl)ethyl)-4-(1-methyl-1H-indol-4-yloxy)piperidinium	C24H27N3O3+		20.109	3.05582	-8.77666	-208	9.9208	10.1922	14048	90.9118	1838
ZINC_A103	1-(2-(4,5-diphenyl-4H-1,2,4-triazol-3-ylthio)ethyl)piperidinium	C21H26N4S+		23.2478	3.7844	-9.26194	-27.17	14.861	8.9841	10131	90.9118	1346
ZINC_A104	1-(2-(((3-cyano-1-methyl-1H-indol-2-yl)methyl)(phenyl)amino)-2-oxoethyl)pyrrolidinium	C23H26N4O+		0	9.12096	-11.6086	0	0	10.2565	13057	90.9118	1662
ZINC_A106	4-(2-(4-phenyl-5-p-tolyl-4H-1,2,4-triazol-3-ylthio)ethyl)morpholin-4-ium	C21H26N4OS+		0	9.25935	-12.0715	0	0	9.4633	10812	90.9118	1404
ZINC_A108	3-amino-7-ethoxy-N,N-diethylthieno[2,3-b]quinoline-2-carboxamide	C18H23N3O2S		0	21.8941	-11.2224	0	0	10.424	13884	90.9118	1775
ZINC_A109	(3-amino-7-ethoxythieno[2,3-b]quinolin-2-yl)(p-tolyl)methanone	C21H20N2O2S		0	14.5717	-12.3066	0	0.0635	10.0758	11628	90.9118	1540
ZINC_A110	(3-amino-7-ethoxythieno[2,3-b]quinolin-2-yl)(2,5-dimethoxyphenyl)methanone	C22H22N2O4S		0	25.6029	-10.4621	0	0	9.3334	9489	90.9118	1260
ZINC_A111	1-(2-(4-phenyl-5-(pyridin-3-yl)-4H-1,2,4-triazol-3-ylthio)ethyl)piperidinium	C20H25N5S+		0	10.4473	-11.3214	0	0	10.5222	14240	90.9118	1818
ZINC_A112	1-(3-(2,3-dihydro-1H-inden-5-ylamino)-3-oxopropyl)-4-(2-fluorophenyl)piperazin-1-ium	C22H29FN3O+		0	3.45775	-11.4226	0	0	9.688	13376	90.9118	1851
ZINC_A113	1-(3-(2,5-dimethylphenylamino)-3-oxopropyl)-4-(2-fluorophenyl)piperazin-1-ium	C21H29FN3O+		21.6333	5.5745	-7.3351	40.89	15.8374	9.8354	10020	90.9118	1353
ZINC_A114	1-(2-(5-(pyridin-3-yl)-4-p-tolyl-4H-1,2,4-triazol-3-ylthio)ethyl)piperidinium	C21H27N5S+		0	2.21199	-11.2095	0	0	11.2507	15825	90.9118	2095
ZINC_A116	(3-amino-7-methylthieno[2,3-b]quinolin-2-yl)(2,5-dimethoxyphenyl)methanone	C21H20N2O3S		0	5.76597	-10.473	0	0	11.4068	18680	90.9118	2390
ZINC_A118	(3-amino-6-methylthieno[2,3-b]quinolin-2-yl)(2,5-dimethoxyphenyl)methanone	C21H20N2O3S		0	6.04721	-11.5689	0	0	10.6753	14427	90.9118	1866
ZINC_A119	(3-amino-6-ethoxythieno[2,3-b]quinolin-2-yl)(3,4-dihydroquinolin-1(2H)-yl)methanone	C23H23N3O2S		0	4.96493	-11.2726	0	0	10.285	15420	90.9118	2148
ZINC_A12	(1R,4aS,10aR)-6-hydroxy-1-methyl-3-((pyridin-2-yloxy)methyl)-1,2,4a,5,10,10a-hexahydrobenzo[g]quinolinium	C20H25N2O2+		0	3.46564	-7.31425	0	12.1881	11.7852	16084	90.9118	2164
ZINC_A123	(1r,4r)-1-benzyl-4-(2-methylimidazo[1,2-a]pyridine-3-carboxamido)piperidinium	C21H30N4O+		21.6938	10.1287	-7.75171	29.1	15.2808	11.099	15815	90.9118	2143
ZINC_A124	(1r,4r)-1-benzyl-4-(7-methylimidazo[1,2-a]pyridine-2-carboxamido)piperidinium	C21H30N4O+		21.6938	9.90384	-7.69466	29.1	15.2808	11.099	16059	90.9118	2181
ZINC_A125	3-(benzyl(2-hydroxyethyl)amino)-4-chloro-1-(2,3-dimethylphenyl)-1H-pyrrole-2,5-dione	C21H22ClN2O3		20.4746	6.78422	-6.93406	12.07	12.7157	10.5763	12443	90.9118	1648
ZINC_A126	N-ethyl-N-((7-hydroxy-3-(1-methyl-1H-benzo[d]imidazol-2-yl)-2-oxo-2H-chromen-8-yl)methyl)ethanaminium	C22H26N3O3+		20.4746	9.00714	-7.72695	12.07	12.7157	10.5763	12683	90.9118	1684
ZINC_A135	(3-amino-6-(4-methoxyphenyl)thieno[2,3-b]pyridin-2-yl)(4-methoxyphenyl)methanone	C22H20N2O3S		20.4746	9.04271	-7.73047	12.07	12.7157	10.5763	12683	90.9118	1684
ZINC_A136	(3-amino-4-(methoxymethyl)-6-methylthieno[2,3-b]pyridin-2-yl)(p-tolyl)methanone	C18H20N2O2S		21.6938	7.89016	-7.70057	29.1	15.2808	11.099	15775	90.9118	2131
ZINC_A138	1-(2-(5-(furan-2-yl)-4-phenyl-4H-1,2,4-triazol-3-ylthio)ethyl)piperidinium	C19H24N4OS+		18.5311	5.37746	-8.06576	-465.98	0	10.4382	11873	90.9118	1604
ZINC_A141	(S)-N,N-diethyl-2-(4-oxo-3-p-tolyl-1,2,3,4-tetrahydroquinazolin-2-ylthio)ethanaminium	C21H30N3OS+		20.4191	7.17871	-7.34041	219.68	17.0155	11.7784	15814	90.9118	2100
ZINC_A144	(3-amino-6-(3-methoxyphenyl)thieno[2,3-b]pyridin-2-yl)(3,4-dimethoxyphenyl)methanone	C23H22N2O4S		0	4.66617	-11.2717	0	0	10.1713	13530	90.9118	1843
ZINC_A145	ethyl 3-amino-4-(furan-2-yl)-6-p-tolylfuro[2,3-b]pyridine-2-carboxylate	C21H20N2O4		0	10.8728	-11.3015	0	0	10.3646	15904	90.9118	2105
ZINC_A147	ethyl 3-amino-4-(furan-2-yl)-6-p-tolylfuro[2,3-b]pyridine-2-carboxylate	C21H20N2O4		0	9.02309	-11.3022	0	0	11.642	19822	90.9118	2529
ZINC_A148	(R)-3-(2-phenylhydrazinyl)-1-(4-(piperidin-1-yl)phenyl)pyrrolidine-2,5-dione	C21H26N4O2		0	6.81314	-11.4276	0	0	10.3646	14805	90.9118	1982
ZINC_A149	(1S,2R,6R)-2-((R)-2-hydroxy-2-phenylethyl)-1-methyl-6-(2-oxo-2-phenylethyl)piperidinium	C22H30NO2+		0	17.5174	-9.96798	0	0	10.6184	13672	90.9118	1760
ZINC_A150	(5-amino-4-methyl-2-phenylthieno[2,3-d]pyrimidin-6-yl)(4-methoxyphenyl)methanone	C21H19N3O2S		24.1	10.5996	-7.56021	153.54	16.7276	10.0174	10670	90.9118	1431
ZINC_A155	4-(4-acetylphenyl)-1-(4-(methoxycarbonyl)benzyl)piperazin-1-ium	C21H26N2O3+		0	20.3373	-10.4688	0	0	11.7454	15758	90.9118	2032
ZINC_A16	(S)-1-(2-hydroxy-3-(4-(2-phenylpropan-2-yl)phenoxy)propyl)pyrrolidinium	C22H32NO2+		0	21.6241	-11.7246	0	0.1551	10.8952	14235	90.9118	1806
ZINC_A160	4-(4-acetylphenyl)-1-((2-methoxynaphthalen-1-yl)methyl)piperazin-1-ium	C24H28N2O2+		0	4.07722	-10.4962	0	0	11.6511	21494	90.9118	2846
ZINC_A161	4-(4-acetylphenyl)-1-((4-methoxynaphthalen-1-yl)methyl)piperazin-1-ium	C24H28N2O2+		0	22.107	-11.1359	0	0	11.0512	13710	90.9118	1750
ZINC_A164	(3-tert-butyl-6-oxo-1-phenyl-6,7-dihydro-1H-pyrazolo[3,4-b]pyridin-5-yl)-N-(furan-2-ylmethyl)methanaminium	C22H27N4O2+		0	8.18599	-11.134	0	0	11.1898	15144	90.9118	1942
ZINC_A165	(3-tert-butyl-6-hydroxy-1-phenyl-1H-pyrazolo[3,4-b]pyridin-5-yl)-N-(furan-2-ylmethyl)methanaminium	C22H27N4O2+		21.6333	4.71544	-7.33144	40.89	15.8374	9.8354	10048	90.9118	1356
ZINC_A167	(3S,5S)-1-((S)-3-(9H-carbazol-9-yl)-2-hydroxypropyl)-3,5-dimethylpiperidinium	C22H31N2O+		22.2499	8.63937	-7.6374	136.5	13.7826	10.5865	12976	90.9118	1721
ZINC_A168	1-(2-(4-oxo-3-phenyl-3,4-dihydroquinazolin-2-ylthio)ethyl)piperidinium	C21H25N3OS+		19.4923	9.03133	-6.73447	-160.05	16.2815	11.3565	16499	90.9118	2271
ZINC_A170	1-(2-(5-cyano-2,4'-bipyridin-6-ylthio)ethyl)piperidinium	C18H22N4S+		0	9.61131	-10.8819	0	0	10.729	17044	90.9118	2253
ZINC_A171	2-(5-(benzyloxycarbonyl)-2,4-dimethyl-1H-pyrrol-3-yl)-N,N-diethylethanaminium	C20H31N2O2+		0	7.92435	-11.0839	0	0	10.4426	15110	90.9118	2002
ZINC_A172	(1r,4r)-4-benzyl-1-((7-methoxy-2-oxo-2H-chromen-4-yl)methyl)piperidinium	C23H27NO3+		0	24.3631	-11.3435	0	0	11.3039	15041	90.9118	1940
ZINC_A174	1-methyl-4-(4-(6-phenylpyrimidin-4-ylamino)phenyl)piperazin-1-ium	C21H26N5+		21.5931	6.24259	-6.95332	-7.19	15.1337	10.7396	13369	90.9118	1807
ZINC_A175	(E)-5-(1-(azepan-1-ylamino)ethylidene)-3-benzyl-6-hydroxypyrimidine-2,4(3H,5H)-dione	C19H26N4O3		21.6132	9.75879	-7.64096	255.89	16.874	11.7054	16948	90.9118	2252
ZINC_A176	4-(furan-2-carbonyl)-1-(2-(naphthalen-1-yloxy)ethyl)piperazin-1-ium	C21H24N2O3+		0	5.083	-7.1489	0	0	10.8138	11526	0	1483
ZINC_A177	(R)-1-(3,4-dimethoxyphenethyl)-3-(2-phenylhydrazinyl)pyrrolidine-2,5-dione	C20H25N3O4		0	6.25217	-7.2058	0	0	10.8138	11767	0	1515
ZINC_A178	(S)-1-(3,4-dimethoxyphenethyl)-3-(2-phenylhydrazinyl)pyrrolidine-2,5-dione	C20H25N3O4		20.4191	7.84827	-8.16451	-89.8	7.5086	10.4725	12959	0	1766
ZINC_A179	1-((2-(ethoxycarbonyl)benzofuran-3-yl)methyl)-4-phenylpiperazin-1-ium	C22H26N2O3+		23.1807	9.90908	-7.69967	7.35	13.5131	9.3623	8742	88.9135	1168
ZINC_A180	2-(3-(4-methoxyphenyl)-4-oxo-3,4-dihydroquinazolin-2-ylthio)-N,N-dimethylethanaminium	C19H23N3O2S+		0	23.9231	-10.7089	0	0.1163	11.2334	13023	88.9135	1679
ZINC_A181	N,N-diethyl-2-(4-oxo-3-o-tolyl-3,4-dihydroquinazolin-2-ylthio)ethanaminium	C21H27N3OS+		21.6736	9.66715	-8.3824	-251.4	12.2582	10.0284	13000	88.9135	1759
ZINC_A183	N,N-dimethyl-2-(4-(2-methylbenzo[d]thiazol-6-ylamino)quinazolin-2-yl)ethanaminium	C20H24N5S+		21.6736	9.66715	-8.3824	-251.4	12.2582	10.0284	13000	88.9135	1759
ZINC_A184	N,N-dimethyl-2-(4-(2-methylbenzo[d]thiazol-5-ylamino)quinazolin-2-yl)ethanaminium	C20H24N5S+		23.7259	1.71341	-7.80531	222.22	13.6157	10.5654	15780	88.9135	2083
ZINC_A185	(1R,3s,5S,8s)-3-(2-hydroxy-2,2-diphenylacetoxy)-8-methyl-8-azonia-bicyclo[3.2.1]octane	C22H27NO3+		0	7.13942	-12.7878	0	0	10.3066	12748	88.9135	1634
ZINC_A186	(5-hydroxy-3-(4-methoxybenzoyl)naphtho[1,2-b]furan-4-yl)-N,N-dimethylmethanaminium	C23H23NO4+		0	12.5387	-11.401	0	0	10.2472	15201	88.9135	2046
ZINC_A187	((3R,5R)-2-methyl-3-phenylisoxazolidin-5-yl)methyl 4-methoxybenzoate	C19H21NO4		0	11.2267	-11.2812	0	0	11.4357	17420	88.9135	2265
ZINC_A188	3-amino-N-benzyl-4-(methoxymethyl)-N,6-dimethylthieno[2,3-b]pyridine-2-carboxamide	C19H23N3O2S		0	10.868	-11.3058	0	0	11.4357	17800	88.9135	2321
ZINC_A190	(1S,3r,5R,8s)-8-(2-(4-benzylphenoxy)ethyl)-3-(methoxycarbonyl)-8-azonia-bicyclo[3.2.1]octane	C24H30NO3+		0	6.762	-11.5723	0	0	11.0735	14999	88.9135	1965
ZINC_A191	(1R,3s,5S,9s)-9-(2-hydroxy-2,2-diphenylacetoxy)-3-methyl-3-azonia-bicyclo[3.3.1]nonane	C23H30NO3+		0	10.0134	-11.3673	0	0	11.0135	14999	88.9135	1965
ZINC_A193	(E)-1-(3-(hydroxyimino)-3-(3-methylthiophen-2-yl)propyl)-4-(2-methoxyphenyl)piperazin-1-ium	C19H28N3O2S+		0	11.3005	-10.7913	0	0	10.5652	11979	88.9135	1509
ZINC_A194	(2S,3S)-5-amino-N-(3-phenylpropyl)-N-propyl-1,2,3,4-tetrahydronaphthalen-2-aminium	C22H34N2+		0	15.0661	-10.7159	0	0	11.0116	13127	88.9135	1692
ZINC_A195	(E)-1-(2-(2-(4-methoxybenzylideneamino)-1H-benzo[d]imidazol-1-yl)ethyl)piperidinium	C22H28N4O+		0	18.8727	-11.8332	0	0	9.5882	9986	88.9135	1292
ZINC_A197	(1r,4r)-4-(2,2-diphenyl-2-propoxyacetoxy)-1-methylpiperidinium	C23H31NO3+		0	23.1652	-11.5103	0	0	9.9135	11848	88.9135	1524
ZINC_A20	N-allyl-N-((6-(ethoxycarbonyl)-2-methyl-4-oxo-1,4-dihydroquinolin-3-yl)methyl)prop-2-en-1-aminium	C20H27N2O3+		0	2.90251	-12.1372	0	0	10.8177	15876	88.9135	2084
ZINC_A202	(1r,4r)-1-(2-cyanoethyl)-4-((1-methyl-1H-indole-3-carbonyloxy)methyl)piperidinium	C19H25N3O2+		0	26.5072	-10.5021	0	0	10.6252	15217	88.9135	1941
ZINC_A203	(R)-N-methyl-N-(3-(3-(1-methyl-1H-indol-3-yl)-1,2,4-oxadiazol-5-yl)propyl)butan-1-aminium	C19H28N4O+		26.0574	9.23079	-6.78597	-13.9	10.6041	10.2397	12644	88.9135	1705
ZINC_A205	(S)-4-(1-(2-aminophenyl)-3-oxoisoindolin-2-yl)-N,N-diethylbutan-1-aminium	C22H33N3O+		0	4.31551	-10.9376	0	0	10.1858	15063	88.9135	1991
ZINC_A207	(E)-3-(6-(4-methoxystyryl)-1-oxophthalazin-2(1H)-yl)-N-methylpropan-1-aminium	C21H26N3O2+		20.3455	2.19167	-8.27065	-181.4	10.621	10.2165	15628	88.9135	2143
ZINC_A208	4-(5-methoxypyrimidin-4-yl)-1-(4-phenylbutyl)piperazin-1-ium	C19H28N4O+		0	2.20887	-11.1846	0	0	10.6496	14846	88.9135	1952
ZINC_A21	2-(2-amino-3-(ethoxycarbonyl)-1H-pyrrolo[2,3-b]quinoxalin-1-yl)-N,N-dimethylethanaminium	C17H25N5O2+		0	16.001	-10.9115	0	0	10.4145	11229	88.9135	1490
ZINC_A210	N,N-dimethyl-2-(2-(1-(naphthalen-2-yl)cyclobutyl)-2-oxoethylthio)ethanaminium	C20H27NOS+		0	23.3116	-10.1418	0	0.1163	10.8967	13217	88.9135	1720
ZINC_A211	N,N-diethyl-3-(4-methylpyridazino[4,5-b]indolizin-1-ylamino)propan-1-aminium	C18H28N5+		0	22.9005	-10.1241	0	0.1163	10.8967	13201	88.9135	1720
ZINC_A214	N-methyl-5-(2-(phenylsulfonyl)phenoxy)pentan-1-aminium	C18H26NO3S+		0	4.90415	-11.0733	0	0	10.908	14052	88.9135	1870
ZINC_A215	3-(4-(1-(cyanomethyl)-1H-pyrazolo[3,4-b]pyridin-3-yl)phenoxy)-N,N-dimethylpropan-1-aminium	C19H23N5O+		18.9695	4.91575	-9.57427	-441.57	4.3118	9.1327	11501	88.9135	1553
ZINC_A216	10-(3-(dimethylammonio)propylamino)-7-hydroxy-11-oxo-11H-indeno[1,2-b]quinolinium	C21H27N3O2+2		0	10.0638	-10.9486	0	0.2326	11.0382	19364	0	2538
ZINC_A218	1-(3-(2,3-dihydro-1H-inden-5-yloxy)propyl)-4-(pyrimidin-2-yl)piperazin-1-ium	C20H28N4O+		0	14.7336	-12.3946	0	0.2292	10.6631	13282	0	1710
ZINC_A221	1-(4-(4-(1H-pyrrol-1-yl)-1H-pyrazol-1-yl)butyl)-4-(pyrimidin-2-yl)piperazin-1-ium	C19H27N7+		0	4.29919	-11.2854	0	0.1551	10.4865	11909	0	1482
ZINC_A223	4-(2-methoxyphenyl)-1-(4-(3-methyl-6-oxopyridazin-1(6H)-yl)butyl)piperazin-1-ium	C20H30N4O2+		0	17.952	-10.2429	0	0	10.9048	15705	0	2027
ZINC_A224	N,N-diethyl-2-(N-(9-oxo-9H-fluoren-4-yl)propionamido)ethanaminium	C22H28N2O2+		0	19.1251	-12.1079	0	0	10.9235	13322	0	1714
ZINC_A225	4-(3-(2-(3,5-dimethoxyphenoxy)ethoxy)pyrazin-2-yl)piperazin-1-ium	C18H27N4O4+		0	18.4659	-10.4681	0	0	9.3906	11892	0	1557
ZINC_A226	4-(3-(2-(1-oxo-2,3-dihydro-1H-inden-4-yloxy)ethoxy)pyrazin-2-yl)piperazin-1-ium	C19H25N4O3+		0	23.7636	-10.0579	0	0.1163	9.7406	12230	0	1572
ZINC_A228	(R)-2-(2-(benzyloxy)-2-oxoethyl)-6,7-dimethoxy-1,2,3,4-tetrahydroisoquinolinium	C20H25NO4+		0	20.8455	-10.2136	0	0.1163	10.8909	13329	0	1699
ZINC_A229	1-(4-(benzo[d]oxazol-2-yl)butyl)-4-phenylpiperazin-1-ium	C21H27N3O+		0	29.156	-10.1262	0	0.1163	10.6624	15263	0	2005
ZINC_A230	1-(3-(4-(6-fluorobenzo[d]isoxazol-3-yl)phenoxy)propyl)piperidinium	C21H25FN2O2+		0	19.4813	-10.5458	0	0.1163	10.1366	10028	0	1280
ZINC_A231	1-(3-(4-(6-fluorobenzo[d]isoxazol-3-yl)phenoxy)propyl)pyrrolidinium	C20H23FN2O2+		0	22.0958	-9.86154	0	0.1163	9.6084	10165	0	1294
ZINC_A232	(1R,1s,4S)-N-(4-(4-hydroxyphenyl)butyl)-N-methyl-4-phenylcyclohexanaminium	C23H34NO+		0	35.4269	-11.648	0	0.1163	9.4656	10390	0	1328
ZINC_A234	4-(6-(5-phenylpentyloxy)pyrazin-2-yloxy)piperidinium	C20H30N3O2+		0	23.8535	-10.5465	0	0.1163	9.7661	13201	0	1725
ZINC_A235	1-((2-(1H-benzo[d]imidazol-1-yl)ethoxy)methyl)-4-(2-methoxyphenyl)piperazin-1-ium	C21H28N4O2+		0	18.9482	-14.7964	0	0	10.4587	12236	0	1583
ZINC_A236	N-methyl-4-(3-(3-oxoisothiazolo[5,4-b]pyridin-2(3H)-yl)phenoxy)butan-1-aminium	C17H22N3O2S+		0	14.3132	-9.94116	0	0	10.2958	16523	0	2163
ZINC_A237	(3R,4aR)-3-(4-(1,3-dioxoisoindolin-2-yl)butyl)-2,3,4,4a,5,6-hexahydro-1H-pyrazino[1,2-a]quinolin-3-ium	C24H29N3O2+		0	17.2555	-9.59662	0	0.1163	10.6309	12126	0	1564
ZINC_A239	(1r,4S)-1-((S)-1,4-dioxo-1,4-diphenylbutan-2-yl)-4-methylpiperidinium	C22H27NO2+		0	24.1116	-10.8763	0	0	9.7491	14140	0	1937
ZINC_A27	4-(4-acetylphenyl)-1-(4-methoxy-3-methylbenzyl)piperazin-1-ium	C21H28N2O2+		0	26.6492	-11.2465	0	0	9.765	14102	0	1890
ZINC_A28	4-(4-acetylphenyl)-1-(4-isopropylbenzyl)piperazin-1-ium	C22H30N2O+		0	6.52988	-11.8751	0	0	9.6852	12904	0	1728
ZINC_A29	4-(4-acetylphenyl)-1-(4-(dimethylamino)benzyl)piperazin-1-ium	C21H29N3O+		0	32.7659	-11.3181	0	0	10.0496	15345	0	2060
ZINC_A3	(R)-N-benzyl-1-(4-cyanophenyl)-N-methylpiperidin-4-aminium	C20H25N3+		0	33.7362	-11.3778	0	0	9.5858	13571	0	1826
ZINC_A32	(Z)-4-(4-fluorophenyl)-1-(2-(2-(1-(furan-2-yl)ethylidene)hydrazinyl)-2-oxoethyl)piperazin-1-ium	C18H24FN4O2+		0	8.30491	-11.1329	0	0.2326	10.7347	15050	0	1910
ZINC_A34	3-amino-6-ethoxy-N,N-diethylthieno[2,3-b]quinoline-2-carboxamide	C18H23N3O2S		0	23.7781	-11.1204	0	0	10.0018	15285	0	1982
ZINC_A35	(3-amino-6-ethoxythieno[2,3-b]quinolin-2-yl)(pyrrolidin-1-yl)methanone	C18H21N3O2S		0	9.73232	-10.3975	0	0	10.7715	17351	0	2283
ZINC_A39	4-(2-methoxyphenyl)-1-(2-(1-methyl-5-(thiophen-2-yl)-1H-pyrazol-4-yl)ethyl)piperazin-1-ium	C21H28N4OS+		0	36.2917	-9.6258	0	0.1163	9.4173	10117	0	1346
ZINC_A4	(1r,4S)-4-benzyl-1-((2S,3R)-4-hydroxy-3-(4-hydroxyphenyl)butan-2-yl)piperidinium	C22H33NO2+		0	4.32622	-11.6276	0	0	10.1892	11682	0	1490
ZINC_A41	(R)-4-(1H-indazol-3-yl)-1-(3-(2-methyl-3H-indol-3-yl)propyl)piperazin-1-ium	C23H30N5+		0	17.6188	-10.9287	0	3.2007	9.5728	11058	90.9118	1392
ZINC_A42	(1r,4s)-4-(2-methoxy-N-phenylacetamido)-1-phenethylpiperidinium	C22H30N2O2+		0	5.97589	-12.0463	0	0	9.9602	11928	90.9118	1542
ZINC_A46	4-(2-fluorophenyl)-1-(3-methoxy-4-(methylcarbamoyloxy)benzyl)piperazin-1-ium	C20H27FN3O3+		0	4.60353	-11.6028	0	0	10.0966	12694	90.9118	1597
ZINC_A48	(Z)-1-(4-methoxyphenyl)-2-(3-(piperidin-1-ylamino)quinoxalin-2(1H)-ylidene)ethanone	C22H26N4O2		0	11.1948	-11.3043	0	0	10.2115	13606	90.9118	1784
ZINC_A55	dimethyl 3-(dimethylamino)-5-methyl-4-phenylcyclopenta[c]quinolizine-1,2-dicarboxylate	C25H24N2O4		0	11.0932	-11.1582	0	0	10.4271	14057	90.9118	1818
ZINC_A57	(3-amino-6-(3,4-dimethoxyphenyl)thieno[2,3-b]pyridin-2-yl)(phenyl)methanone	C22H20N2O3S		25.9778	9.01357	-7.51692	127.87	16.1931	9.658	9988	90.9118	1348
ZINC_A59	(3-amino-6-(4-methoxyphenyl)thieno[2,3-b]pyridin-2-yl)(3,4-dimethoxyphenyl)methanone	C23H22N2O4S		21.3543	4.64936	-7.30399	189.65	3.0642	11.0958	15989	90.9118	2118
ZINC_A6	(3-amino-6-(benzyloxy)benzofuran-2-yl)(cyclohexyl)methanone	C22H25NO3		19.3213	9.11769	-7.66869	-135.23	16.5088	11.7159	19227	90.9118	2652
ZINC_A60	(3-amino-6-(4-methoxyphenyl)thieno[2,3-b]pyridin-2-yl)(3-methoxyphenyl)methanone	C22H20N2O3S		20.4746	6.82061	-6.93608	12.07	12.7157	10.5763	12443	90.9118	1648
ZINC_A61	(S)-(3-amino-6-ethyl-5,6,7,8-tetrahydrothieno[2,3-b]quinolin-2-yl)(2-methoxyphenyl)methanone	C21H24N2O2S		0	6.7992	-10.7916	0	0	10.9801	13557	90.9118	1828
ZINC_A62	(R)-(3-amino-6-ethyl-5,6,7,8-tetrahydrothieno[2,3-b]quinolin-2-yl)(2-methoxyphenyl)methanone	C21H24N2O2S		25	9.12562	-7.70155	-21.01	16.9876	11.0747	16998	90.9118	2353
ZINC_A63	(S)-(3-amino-6-ethyl-5,6,7,8-tetrahydrothieno[2,3-b]quinolin-2-yl)(3-methoxyphenyl)methanone	C21H24N2O2S		0	16.7554	-10.0994	0	0.9624	10.7715	15291	90.9118	2027
ZINC_A64	(R)-(3-amino-6-ethyl-5,6,7,8-tetrahydrothieno[2,3-b]quinolin-2-yl)(3-methoxyphenyl)methanone	C21H24N2O2S		0	17.4353	-10.0791	0	0	11.0579	16643	90.9118	2192
ZINC_A7	(1r,4R)-4-benzyl-1-((1R,2R)-1-hydroxy-1-(4-hydroxyphenyl)propan-2-yl)piperidinium	C21H31NO2+		0	19.9909	-11.2655	0	0.9624	11.2043	14849	90.9118	1949
ZINC_A70	(3-amino-6-phenylthieno[2,3-b]pyridin-2-yl)(3,4-dimethoxyphenyl)methanone	C22H20N2O3S		0	24.5457	-11.3927	0	0	10.8401	13555	90.9118	1750
ZINC_A71	(R)-diethyl 5,5-diphenyl-4,5-dihydro-1H-pyrazole-3,4-dicarboxylate	C21H23N2O4		21.5931	6.14422	-6.7554	-7.19	15.1337	10.7396	13359	90.9118	1806
ZINC_A72	3-amino-4-(methoxymethyl)-6-methyl-N,N-diphenylthieno[2,3-b]pyridine-2-carboxamide	C23H23N3O2S		0	19.141	-10.1992	0	0.1163	10.9739	15199	0	2004
ZINC_A75	1-(4-hydroxy-3,5-dimethoxybenzyl)-4-(2-methoxyphenyl)piperazin-1-ium	C20H29N2O4+		21.6938	8.55887	-7.74325	29.1	15.2808	11.099	16323	88.9135	2221
ZINC_A79	(3-(ethoxycarbonyl)-5-hydroxy-1-(4-methoxyphenyl)-2-methyl-1H-indol-4-yl)-N,N-dimethylmethanaminium	C22H28N2O4+		0	21.6388	-11.0545	0	0	10.2651	12060	88.9135	1574
ZINC_A8	(R)-3-(4-ethoxybenzamido)-6-methyl-5,6,7,8-tetrahydro-1,6-naphthyridin-6-ium	C18H22N3O2		19.3213	8.25555	-7.68307	-135.23	16.5088	11.7159	18939	88.9135	2608
ZINC_A80	(R)-1-(3-(4-acetylphenoxy)-2-hydroxypropyl)-4-phenylpiperazin-1-ium	C21H29N2O3+		24.195	7.02355	-7.82994	214.75	14.393	10.7348	14189	88.9135	1900
ZINC_A81	4-(4-acetylphenyl)-1-(biphenyl-4-ylmethyl)piperazin-1-ium	C25H28N2O+		20.3455	2.19133	-8.27066	-181.4	10.621	10.2165	15628	88.9135	2143
ZINC_A82	4-(4-acetylphenyl)-1-(3-ethoxy-4-hydroxybenzyl)piperazin-1-ium	C21H29N2O3+		0	16.0004	-9.48932	0	0.1163	11.189	12731	88.9135	1641
ZINC_A85	(3-amino-6-(3-methoxyphenyl)thieno[2,3-b]pyridin-2-yl)(benzo[d][1,3]dioxol-5-yl)methanone	C22H18N2O4S		0	12.1486	-12.3423	0	0.2326	10.1106	12280	88.9135	1583
ZINC_A87	1-(2-(2-(2-hydroxybenzylamino)-1H-benzo[d]imidazol-1-yl)ethyl)piperidinium	C21H30N4O+		21.4335	10.6228	-7.38714	65.71	16.907	10.1948	11377	88.9135	1526
ZINC_A88	4-(2-(2-(4-methoxybenzylamino)-1H-benzo[d]imidazol-1-yl)ethyl)morpholin-4-ium	C21H29N4O2+		0	0.768764	-10.8193	0	0	10.6333	12698	0	1710
ZINC_A9	(R)-2-((4-amino-2-methylpyrimidin-5-yl)methyl)-6-phenyl-1,2,3,4-tetrahydroisoquinolinium	C21H26N4+		0	2.86305	-11.8573	0	0	9.7536	12791	0	1664
ZINC_A91	(3-amino-4-(methoxymethyl)-6-methylthieno[2,3-b]pyridin-2-yl)(indolin-1-yl)methanone	C19H21N3O2S		0	9.96246	-11.0571	0	0	10.04	14709	0	1903
ZINC_A97	1-(2-(2-(benzo[d][1,3]dioxol-5-ylmethylamino)-1H-benzo[d]imidazol-1-yl)ethyl)piperidinium	C22H29N4O2+		0	6.29941	-10.9759	0	0	10.4305	15495	0	2059
ZINC_A98	4-(8-benzyl-8H-thieno[2,3-b]indole-2-carbonyl)-1-methylpiperazin-1-ium	C23H25N3OS+		0	7.08379	-11.2907	0	0	10.2497	14863	0	1903
ZINC_A99	(S)-5-(phenylsulfonamido)-N,N-dipropyl-2,3-dihydro-1H-inden-2-aminium	C21H31N2O2S+		0	5.5842	-11.0674	0	4.2085	11.4994	19994	0	2605

## Sheet: Test set
ID	Name	MF	pIC50	Pc	DPLL	Homo	HF	H	CLogPMR	TIndx	VP	WIndx
2	N-(3-chlorophenyl)quinazolin-4-amine	C14H11ClN3	7.64	34.3189	2.15715	-8.46106	412.21	8.7737	7.3257	4563	0	608
5	N-(3-bromophenyl)-6-nitroquinazolin-4-amine	C14H10BrN4O2	6.04	0	2.53859	-8.04763	0	8.2536	8.2228	6445	0	930
8	N-(3-bromophenyl)-7-methoxyquinazolin-4-amine	C15H13BrN3O	8	33.4511	1.12878	-8.52505	289.95	10.2712	8.2282	6055	0	831
11	N4-phenylquinazoline-4,6-diamine	C14H15N4	6.11	38.4354	4.85027	-7.5456	461.74	12.0952	7.203	4713	0	603
13	N4-phenylquinazoline-4,7-diamine	C14H15N4	7	38.4354	4.24314	-8.12519	461.74	12.0952	7.203	4761	0	610
15	N-(3-chlorophenyl)-7-nitroquinazolin-4-amine	C14H10ClN4O2	6.09	0	6.21508	-9.05919	0	8.3631	7.9372	6585	0	954
17	6,7-dimethoxy-N-phenylquinazolin-4-amine	C16H16N3O2	7.53	27.3828	2.30236	-8.0452	110.76	11.0995	8.0681	6944	0	924
19	N-(3-iodophenyl)-6,7-dimethoxyquinazolin-4-amine	C16H15IN3O2	9.05	26.3525	2.40816	-8.22483	176.16	11.7344	9.3745	7543	0	1054
25	N4-(3-bromophenyl)-N7-ethylquinazoline-4,7-diamine	C16H17BrN4	7.92	31.0364	3.77186	-8.2369	455	12.0293	8.9076	7236	0	972
27	N4-(3-bromophenyl)-N7-methylquinazoline-4,6,7-triamine	C15H18BrN5	9.16	36.4213	5.64953	-7.54182	497.96	15.6041	8.8125	6829	0	932
29	N4-(3-bromophenyl)-7-methoxyquinazoline-4,6-diamine	C15H16BrN4O	8.42	35.1374	3.47739	-7.68655	312.27	13.7229	8.5969	6721	0	932
33	N-(3-bromophenyl)-6,7-dipropoxyquinazolin-4-amine	C20H23BrN3O2	9.76	19.9121	2.89266	-8.16688	43.06	11.0068	10.7003	12635	0	1724
38	N-(3-bromophenyl)-6-fluoropyrido[3,2-d]pyrimidin-4-amine	C13H9BrFN4	7.35	40.8815	3.29555	-8.76069	300.13	11.8592	7.4157	4928	0	702
40	N4-(3-bromophenyl)-N6,N6-dimethylpyrido[3,2-d]pyrimidine-4,6-diamine	C15H15BrN5	8.01	34.0789	5.73769	-8.26375	522.49	14.693	8.6965	6852	0	930
41	N-(3-bromophenyl)-6-methoxypyrido[3,2-d]pyrimidin-4-amine	C14H12BrN4O	8.36	37.5457	4.93049	-8.61003	343.38	13.1543	8.0171	5880	0	815
45	N4-phenylpyrido[4,3-d]pyrimidine-4,7-diamine	C13H14N5	6.6	43.5113	4.12065	-8.57597	515.17	14.9783	6.9919	4689	0	610
46	N4-(3-nitrophenyl)pyrido[4,3-d]pyrimidine-4,7-diamine	C13H13N6O2	7.39	0	8.2318	-9.2262	0	17.5679	7.6034	6705	0	950
48	N4-(4-bromophenyl)pyrido[4,3-d]pyrimidine-4,7-diamine	C13H13BrN5	7.04	46.7849	6.00156	-8.71644	530.03	15.378	7.7689	5213	0	722
50	N4-(3-methoxyphenyl)pyrido[4,3-d]pyrimidine-4,7-diamine	C14H16N5O	6.88	36.9995	2.97688	-8.54312	350.84	16.2063	7.6088	6174	0	829
51	N4-(4-methoxyphenyl)pyrido[4,3-d]pyrimidine-4,7-diamine	C14H16N5O	6.17	36.9995	3.71913	-8.22469	350.84	16.2063	7.6088	6332	0	853
56	N4-(3-chlorophenyl)pyrido[4,3-d]pyrimidine-4,7-diamine	C13H13ClN5	6.92	40.6732	4.87421	-8.77686	487.96	15.1085	7.4833	5158	0	710
57	N4-m-tolylpyrido[4,3-d]pyrimidine-4,7-diamine	C14H16N5	7.39	37.7768	4.07714	-8.53699	483.06	14.9354	7.4557	5461	0	710
63	N-(3-bromophenyl)pyrido[2,3-d]pyrimidin-4-amine	C13H10BrN4	6.16	44.2084	3.52758	-9.03535	507.71	11.9263	7.4002	4489	0	608
68	N2-methyl-N8-phenylpyrimido[5,4-d]pyrimidine-2,8-diamine	C13H14N6	7.88	41.1441	2.61556	-7.90597	567.64	17.5189	7.2446	5379	0	706
72	N8-(3-bromophenyl)-N2,N2-dimethylpyrimido[5,4-d]pyrimidine-2,8-diamine	C14H14BrN6	9.02	38.2928	1.31009	-8.12289	575.92	17.5761	8.4854	6758	0	930
74	N8-(3-bromophenyl)-N2-(2-morpholinoethyl)pyrimido[5,4-d]pyrimidine-2,8-diamine	C18H22BrN7O	9.09	31.4556	1.36793	-8.10011	495.65	26.6615	10.685	14929	0	2088
78	N8-(m-tolyl)pyrimido[5,4-d]pyrimidine-2,8-diamine	C13H15N6	7.76	42.7186	2.79247	-7.89946	536.49	17.8185	7.2446	5330	0	702
86	N-(3-chloro-4-((3-fluorobenzyl)oxy)phenyl)-6-methyl-5-((5-(pyrrolidin-1-ylmethyl)thiophen-2-yl)ethynyl)pyrimidin-4-amine	C29H27ClFN4OS	7.5	15.105	1.66604	-7.53675	430.84	5.9883	15.1045	38674	1.25	5312
87	N-(3-chloro-4-((3-fluorobenzyl)oxy)phenyl)-5-((3-((dimethylamino)methyl)phenyl)ethynyl)-6-methylpyrimidin-4-amine	C29H27ClFN4O	7.26	13.7786	4.94397	-7.32832	350.22	5.9883	14.3932	35551	1.25	4831
91	N-(3-chloro-4-((3-fluorobenzyl)oxy)phenyl)-6-(thiophen-3-yl)pyrimidin-4-amine	C21H16ClFN3OS	4.66	22.2289	0.734755	-8.80915	192.09	11.3967	11.1016	17204	1.25	2423
96	(E)-4-bromo-2-(((4-(piperidin-1-ylsulfonyl)phenyl)imino)methyl)phenol	C18H20BrN2O3S	5.01	0	4.87112	-9.22509	0	5.6329	10.1678	12403	1.25	1702
ZINC_A100	N,N-diethyl-2-(8-hydroxy-11-oxo-11H-indeno[1,2-b]quinolin-10-yloxy)ethanaminium	C22H25N2O3+		0	19.5948	-11.2619	0	0.1163	10.6182	13314	90.9118	1746
ZINC_A102	N,N-diethyl-2-(2-(4-methylbenzamido)-1H-benzo[d]imidazol-1-yl)ethanaminium	C21H29N4O+		0	23.3952	-9.46384	0	0.1163	10.6784	13574	90.9118	1739
ZINC_A107	(3-amino-7-ethoxythieno[2,3-b]quinolin-2-yl)(4-methylpiperidin-1-yl)methanone	C20H25N3O2S		21.3938	8.77606	-7.58935	60.09	15.9469	10.5856	12855	90.9118	1721
ZINC_A11	4-phenyl-1-(2-(5,6,7,8-tetrahydroquinazolin-4-ylamino)ethyl)piperazin-1-ium	C20H30N5+		0	8.35577	-11.4323	0	0	10.2556	13947	90.9118	1784
ZINC_A115	4-(2-(5-phenyl-4-p-tolyl-4H-1,2,4-triazol-3-ylthio)ethyl)morpholin-4-ium	C21H26N4OS+		0	19.317	-11.351	0	0.9624	11.2043	14781	90.9118	1940
ZINC_A117	(3-amino-6-methylthieno[2,3-b]quinolin-2-yl)(3,4-dimethoxyphenyl)methanone	C21H20N2O3S		21.5931	8.73121	-7.6181	-7.19	15.1337	10.7396	13763	90.9118	1866
ZINC_A120	(R)-(3-amino-6-ethoxythieno[2,3-b]quinolin-2-yl)(2-methylpiperidin-1-yl)methanone	C20H25N3O2S		21.3938	7.37554	-7.69201	60.09	15.9469	10.5856	12541	0	1680
ZINC_A121	(3-amino-6-ethoxythieno[2,3-b]quinolin-2-yl)(4-methoxyphenyl)methanone	C21H20N2O3S		21.8973	7.77575	-7.68191	4.28	15.0535	10.7396	14257	0	1940
ZINC_A122	3-amino-N-cyclohexyl-6-methoxy-N-methylthieno[2,3-b]quinoline-2-carboxamide	C20H25N3O2S		21.8973	8.39107	-7.46202	53.93	15.9469	10.5856	12562	0	1684
ZINC_A127	(3-(benzo[d][1,3]dioxol-5-yl)-7-hydroxy-4-oxo-6-propyl-4H-chromen-8-yl)-N,N-dimethylmethanaminium	C22H25NO5+		0	16.0211	-11.011	0	0	10.6601	14080	0	1916
ZINC_A128	(3-(4-ethoxyphenoxy)-7-hydroxy-2-methyl-4-oxo-4H-chromen-8-yl)-N,N-dimethylmethanaminium	C21H25NO5+		0	18.5914	-10.8575	0	0	10.3737	13936	0	1888
ZINC_A13	(4-(3-hydroxyphenyl)-1,2-dihydroacridin-3-yl)-N,N-dimethylmethanaminium	C22H24N2O+		0	9.34014	-11.5945	0	0	10.407	10497	90.9118	1330
ZINC_A134	3-amino-N,N-dibenzyl-4,6-dimethylthieno[2,3-b]pyridine-2-carboxamide	C24H25N3OS		19.0358	8.98792	-7.55093	331.26	16.0683	12.0891	16901	88.9135	2196
ZINC_A137	(2S,6S)-1-((S)-3-(9H-carbazol-9-yl)-2-hydroxypropyl)-2,6-dimethylpiperidinium	C22H31N2O+		0	11.6993	-10.7892	0	0	10.5652	11713	88.9135	1475
ZINC_A142	(R)-N,N-diethyl-2-(4-oxo-3-p-tolyl-1,2,3,4-tetrahydroquinazolin-2-ylthio)ethanaminium	C21H30N3OS+		0	23.0257	-10.6756	0	0.1163	11.2334	13023	88.9135	1679
ZINC_A143	ethyl 4-amino-5-benzoyl-2-(2-methoxyphenylamino)thiophene-3-carboxylate	C21H23N2O4S		19.8059	11.196	-7.39604	-294.24	14.8223	10.9541	14565	88.9135	1995
ZINC_A15	(R)-1-(2-hydroxy-3-(4-(2-phenylpropan-2-yl)phenoxy)propyl)pyrrolidinium	C22H32NO2+		0	22.3429	-11.1882	0	0	10.424	13884	90.9118	1775
ZINC_A158	4-(2-ethoxyphenyl)-1-(4-(methoxycarbonyl)benzyl)piperazin-1-ium	C21H28N2O3+		0	5.92473	-11.0139	0	0	10.3646	14706	88.9135	1967
ZINC_A162	(S)-1-(2-hydroxy-3-(4-isopropyl-3-methylphenoxy)propyl)-4-phenylpiperazin-1-ium	C23H35N2O2+		0	8.84722	-11.2506	0	0	11.2565	17875	88.9135	2298
ZINC_A169	(2-(benzylthiomethyl)-3-(ethoxycarbonyl)-5-hydroxybenzofuran-4-yl)-N,N-dimethylmethanaminium	C22H27NO4S+		0	3.81258	-11.1252	0	0	11.4177	15040	88.9135	2020
ZINC_A17	3-amino-N-benzyl-N-ethyl-4,6-dimethylthieno[2,3-b]pyridine-2-carboxamide	C19H23N3OS		21.7749	10.3308	-7.37887	197.93	14.8523	10.0417	10209	90.9118	1337
ZINC_A173	N,N-dimethyl-2-(4-(6-phenylpyrimidin-4-ylamino)benzoyloxy)ethanaminium	C21H25N4O2+		0	29.4747	-11.362	0	0.1163	10.6227	17170	88.9135	2258
ZINC_A19	(R)-1-(3-(9H-carbazol-9-yl)-2-hydroxypropyl)azepanium	C21H29N2O+		0	11.8599	-10.7964	0	0	10.1014	10702	90.9118	1348
ZINC_A199	1-(4-(pyridin-4-yl)butyl)-4-(pyrimidin-2-yl)piperazin-1-ium	C17H25N5+		0	6.68945	-12.4381	0	0	8.9256	10365	0	1339
ZINC_A2	(R)-N-((1-benzoylpiperidin-4-yl)methyl)-N-methyl-2,3-dihydro-1H-inden-2-aminium	C23H30N2O+		0	12.7621	-12.008	0	0.1551	10.8086	15161	90.9118	1921
ZINC_A206	3-(6-ethoxy-3-oxo-2-phenyl-2,3-dihydropyridazin-4-ylamino)-N,N-dimethylpropan-1-aminium	C17H27N4O2+		0	31.1618	-10.034	0	0.1163	9.2165	9722	0	1276
ZINC_A209	1-(4-(4-aminophenyl)butyl)-4-(5-methoxypyrimidin-4-yl)piperazin-1-ium	C19H31N5O+		0	3.78684	-10.0663	0	0	10.1223	14280	0	1886
ZINC_A212	1-(3-(4-methylpyridazino[4,5-b]indolizin-1-ylamino)propyl)piperidinium	C19H28N5+		0	21.2005	-9.83496	0	0	9.8948	11584	0	1474
ZINC_A213	3-(3,4-dihydrobenzo[b][1,4]thiazepin-5(2H)-yl)-3-oxo-N-(2-(m-tolyloxy)ethyl)propan-1-aminium	C21H29N2O2S+		0	6.80652	-10.6586	0	0.1163	11.0178	15607	0	2054
ZINC_A22	(1R,2R,6S)-2-((R)-2-hydroxy-2-phenylethyl)-1-methyl-6-(2-oxo-2-phenylethyl)piperidinium	C22H30NO2+		0	9.73825	-12.6094	0	0	10.3066	12748	90.9118	1634
ZINC_A220	3-(3-(1,3-dioxoisoindolin-2-yl)propylcarbamoyl)-2,2,5,5-tetramethyl-2,5-dihydro-1H-pyrrolium	C20H29N3O3+		0	10.254	-12.7735	0	0	10.1795	13989	0	1861
ZINC_A227	4-(5,6-dimethyl-3-(2-phenoxyethoxy)pyrazin-2-yl)piperazin-1-ium	C18H27N4O2+		0	19.6869	-11.1174	0	0	9.4429	11415	0	1492
ZINC_A23	4-(3-allyl-2-hydroxybenzylamino)-2,3-dimethyl-1-phenyl-1,2-dihydropyrazol-5-one	C21H25N3O2		20.9842	4.24184	-6.99926	111.75	0	10.4217	13321	90.9118	1746
ZINC_A233	(R)-1-(4-(5H-[1,3]dioxolo[4,5-f]indol-7-yl)butyl)-4-phenyl-1,2,3,6-tetrahydropyridinium	C24H29N2O2+		0	14.6667	-10.2851	0	0.1163	11.3387	19422	0	2527
ZINC_A24	4-(2-ethoxyphenyl)-1-(4-hydroxybenzyl)piperazin-1-ium	C19H27N2O2+		0	4.74445	-10.9017	0	0	9.4013	10315	90.9118	1350
ZINC_A240	(1R,4r)-4-((R)-2-hydroxy-5-methyl-2-phenylhex-5-en-3-ynoyloxy)-1-methylpiperidinium	C19H26NO3+		0	19.8428	-11.1769	0	0	9.2637	9324	0	1208
ZINC_A25	4-(4-acetylphenyl)-1-(naphthalen-1-ylmethyl)piperazin-1-ium	C23H26N2O+		0	11.6123	-11.3583	0	0	10.8188	14939	90.9118	1906
ZINC_A26	4-(4-acetylphenyl)-1-(2-ethoxybenzyl)piperazin-1-ium	C21H28N2O2+		0	10.5012	-11.3864	0	0	10.2115	13361	90.9118	1744
ZINC_A33	(3-aminobenzofuran-2-yl)(2,4,6-trimethoxyphenyl)methanone	C18H19NO5		22.3552	1.9686	-7.51034	-467.14	12.2471	8.8206	9083	90.9118	1255
ZINC_A37	(E)-1-benzyl-5-(1-(piperidin-1-ylamino)ethylidene)pyrimidine-2,4,6(1H,3H,5H)-trione	C18H24N4O3		25.7672	7.51039	-7.05175	0.65	16.2035	9.5319	11279	90.9118	1526
ZINC_A38	1-(2-(5-(4-hydroxyphenyl)-1-methyl-1H-pyrazol-4-yl)ethyl)-4-(2-methoxyphenyl)piperazin-1-ium	C23H31N4O2+		0	1.79514	-11.0101	0	0	11.5947	19372	90.9118	2568
ZINC_A40	4-(2-methoxyphenyl)-1-(2-(5-(thiophen-2-yl)isoxazol-4-yl)ethyl)piperazin-1-ium	C20H25N3O2S+		0	2.27483	-11.4067	0	0	10.5713	14266	90.9118	1915
ZINC_A5	(1r,4r)-1-benzyl-4-(cyclohepta[d]imidazol-2-ylamino)piperidinium	C20H25N4+		0	10.7802	-9.82054	0	0	9.8971	12488	90.9118	1576
ZINC_A51	(R)-N-((1-benzoylpiperidin-4-yl)methyl)-N-propyl-2,3-dihydro-1H-inden-2-aminium	C25H34N2O+		0	12.2322	-12.0691	0	0.1551	11.7362	17996	90.9118	2280
ZINC_A52	4-phenyl-1-(2-((1s,4s)-4-(pyrimidin-2-ylamino)cyclohexyl)ethyl)piperazin-1-ium	C22H34N5+		0	10.0585	-11.0464	0	0	11.1832	18407	90.9118	2364
ZINC_A53	(1r,4r)-1-benzyl-4-(4-(methylthio)phenylcarbamoyloxy)piperidinium	C20H27N2O2S+		0	14.7621	-10.0846	0	0	10.554	14164	90.9118	1872
ZINC_A54	(3-(4-ethylphenoxy)-7-hydroxy-2-methyl-4-oxo-4H-chromen-8-yl)-N,N-dimethylmethanaminium	C21H25NO4+		0	15.9291	-10.8158	0	0	10.2206	12532	90.9118	1657
ZINC_A56	dimethyl 1-(dimethylamino)-4-phenylcyclopenta[c]quinolizine-2,3-dicarboxylate	C24H22N2O4		0	9.56068	-6.899	0	12.231	11.3214	14969	90.9118	2017
ZINC_A58	(3-amino-6-(3-methoxyphenyl)thieno[2,3-b]pyridin-2-yl)(3-methoxyphenyl)methanone	C22H20N2O3S		21.6938	9.10674	-7.70915	29.1	15.2808	11.099	15795	90.9118	2141
ZINC_A65	(3-amino-6-(4-methoxyphenyl)thieno[2,3-b]pyridin-2-yl)(2,3-dihydrobenzo[b][1,4]dioxin-6-yl)methanone	C23H20N2O4S		23.3152	10.4619	-7.71678	-47.81	16.8645	11.5385	19179	90.9118	2644
ZINC_A76	N,N-diethyl-2-(4-phenyl-5-(phenylamino)-4H-1,2,4-triazol-3-ylthio)ethanaminium	C20H28N5S+		0	26.6093	-10.1128	0	0.1163	11.1335	13807	90.9118	1778
ZINC_A86	4-(2-(1-benzyl-1H-benzo[d]imidazol-2-ylthio)ethyl)morpholin-4-ium	C20H25N3OS+		0	18.3937	-10.1779	0	0.9624	10.5922	12293	90.9118	1604
ZINC_A89	4-(2-(2-(2-methoxybenzylamino)-1H-benzo[d]imidazol-1-yl)ethyl)morpholin-4-ium	C21H29N4O2+		0	16.231	-10.0202	0	0.9624	10.7715	14779	90.9118	1951
ZINC_A90	4-(2-(2-(3-methoxybenzylamino)-1H-benzo[d]imidazol-1-yl)ethyl)morpholin-4-ium	C21H29N4O2+		0	17.2259	-10.087	0	0.9624	10.7715	15035	90.9118	1989
ZINC_A95	1-(2-fluorobenzyl)-4-(4-propionamidophenyl)piperazin-1-ium	C20H27FN3O+		0	8.62394	-10.3365	0	0	9.9788	13467	90.9118	1804
